# Supplementary material for: Endogenous programmed death ligand-1 restrains the development and onset of Sjӧgren’s syndrome in non-obese diabetic mice
Source: PubMed Central journal article supplement (PMC5155421; doi:10.1038/srep39105), 2016-12-14
Supplement: srep39105-s1.pdf [file srep39105-s1.pdf]

## Supplementary Materials

### **Endogenous programmed death ligand-1 restrains the development and onset of Sjögren's syndrome in non-obese diabetic mice**

Jing Zhou<sup>a,b</sup>, Jun-O Jin<sup>a,1</sup>, Toshihisa Kawai<sup>a,b</sup> and Qing Yu<sup>a,b,\*</sup>

<sup>a</sup> Department of Immunology and Infectious Diseases, the Forsyth Institute,  
245 First Street, Cambridge, MA 02142, USA

<sup>b</sup> Department of Oral Medicine, Infection and Immunity, Harvard School of Dental Medicine,  
188 Longwood Avenue, Boston, MA 02115, USA

<sup>1</sup> Current affiliation: Shanghai Public Health Clinical Center, Shanghai Medical College, Fudan University, Shanghai, 201508, China

H&E Staining

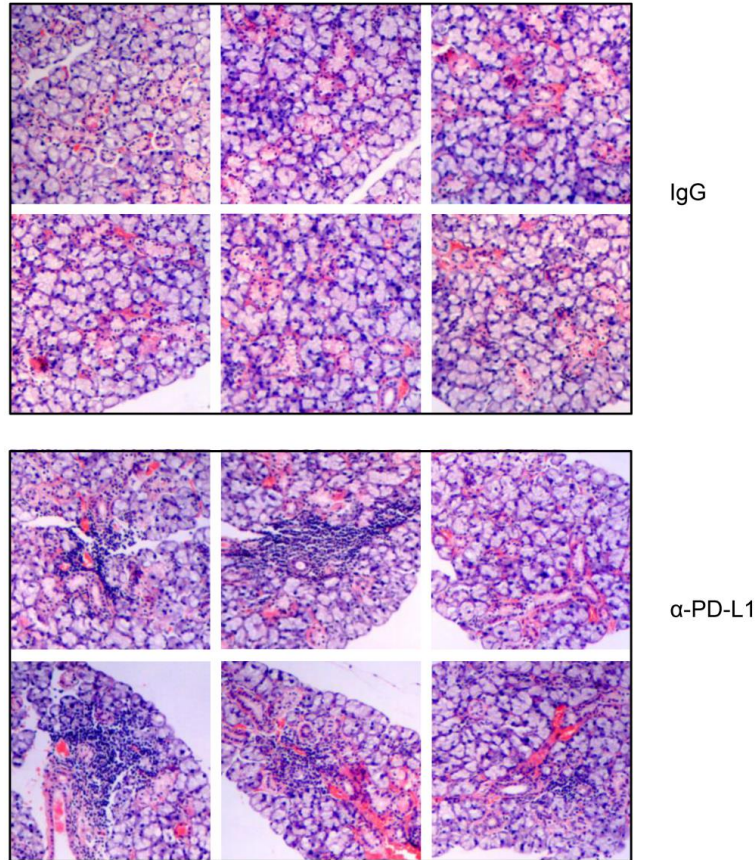

**Supplementary Figure S1. Blockade of PD-L1 accelerates the development of salivary gland inflammation.** NOD/ShiLtJ mice received injections of rat anti-mouse PD-L1 antibody and the isotype control rat IgG2b. Each group of tile image shows multiple areas of a representative H&E stained SMG section from the IgG-treated group (upper panel) or anti-PD-L1-treated group (lower panel). Original magnification  $\times 200$ . Data are representative of analyses of 18 - 20 mice for each group.

**Table S1. Blockade of PD-L1 accelerates leukocyte infiltration of the SMG**

| Treatment<br>Mouse              | IgG   | anti-PD-L1       |
|---------------------------------|-------|------------------|
| 1                               | 0     | 0                |
| 2                               | 0     | 12               |
| 3                               | 0     | 0                |
| 4                               | 0     | 6                |
| 5                               | 0     | 6                |
| 6                               | 0     | 1                |
| 7                               | 1     | 0                |
| 8                               | 0     | 0                |
| 9                               | 0     | 4                |
| 10                              | 0     | 0                |
| 11                              | 0     | 0                |
| 12                              | 0     | 0                |
| 13                              | 0     | 1                |
| 14                              | 0     | 7                |
| 15                              | 0     | 0                |
| 16                              | 0     | 0                |
| 17                              | 0     | 4                |
| 18                              | 0     | 5                |
| 19                              |       | 1                |
| 20                              |       | 2                |
| <b>% Mice with focus (foci)</b> | 5.5   | 55               |
| <b>Mean number of foci</b>      | 0.055 | 2.45<br>(P<0.05) |

**Supplementary Table S1. Blockade of PD-L1 accelerates the appearance of leukocyte foci in the SMG.** The number of leukocyte foci, defined as leukocyte aggregates containing at least 50 cells in a 4 mm<sup>2</sup> area of SMG sections, in NOD/ShiLtJ mice treated with anti-PD-L1 or the isotype control IgG.

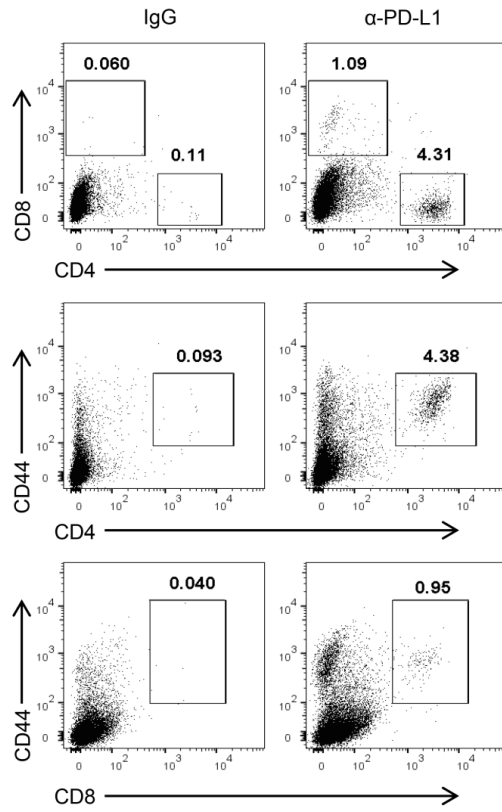

**Supplementary Figure S2. PD-L1 blockade increases the number of CD4 and CD8 T cells in the SMG.** Representative flow cytometry of T lymphocyte populations in SMG-infiltrating mononuclear cells. Data are representative of 6-7 mice for each group.

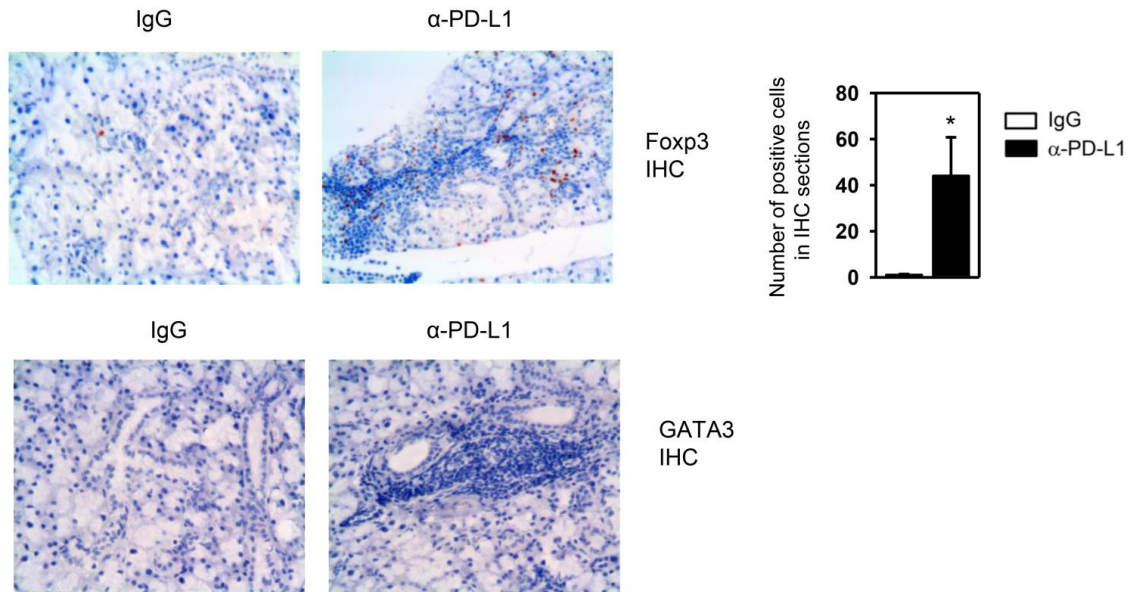

**Supplementary Figure S3. PD-L1 blockade increases the number of Tregs in the SMG.** Immunohistochemical staining of Foxp3 (upper panels) and GATA3 (lower panels) in the SMG sections of anti-PD-L1- and IgG-treated NOD/ShiLtJ mice. Original magnification:  $\times 400$ . The number of Foxp3<sup>+</sup> cells in the immunohisto-chemistry sections were quantified and shown (upper right panel). Data are representative of or the average of the analyses of 6-7 mice for each group. Error bars represent the SEM. \*P < 0.05

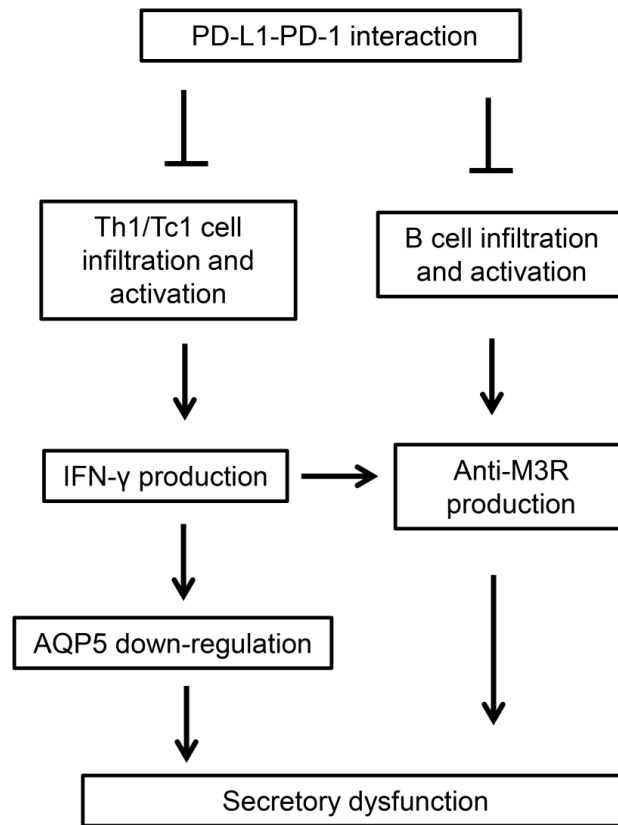

**Supplementary Figure S4. Proposed mechanisms of the regulatory effect of PD-L1 on SS development.** The interaction between PD-L1 and PD-1 impedes Th1 and Tc1 recruitment to the salivary glands in part by down-regulating CXCL9. Diminished IFN- $\gamma$  production resulting from impaired Th1 and Tc1 responses in turn increases AQP5 expression and reduces anti-M3R autoantibody production to hinder the development of salivary gland hypofunction. In addition, PD-L1-PD-1 interaction also impedes B cell recruitment in part by down-regulating CXCL13, thereby curtailing B cell activation and autoantibody production. Hence, endogenous PD-L1, which is up-regulated during early phase of SS development, impedes the development and delays the onset of this disease in a negative feedback manner.
